# Supplementary material for: The Validity of Predictive Equations to Estimate 24-Hour Sodium Excretion: The MESA and CARDIA Urinary Sodium Study
Source: PubMed Central journal article supplement (PMC5860382; doi:10.1093/aje/kwx056), 2017-06-09
Supplement: kwx056allenwebmaterialfinal.pdf [file kwx056allenwebmaterialfinal.pdf]

## WEB MATERIAL

**Web Table 1.** Demographics for participants in the study compared with all eligible participants

|                             | USS study participants | Eligible non-participants | p-value <sup>1</sup> |
|-----------------------------|------------------------|---------------------------|----------------------|
| Sample size, n <sup>2</sup> | 554                    | 568                       |                      |
| Female, n (%)               | 310 (56.0)             | 317 (55.8)                | 0.9605               |
| Age, y                      | 60.3 ± 9.1             | 57.2 ± 9.8                | 0.3075               |
| Black, n (%)                | 319 (57.6)             | 261 (46.0)                | <.0001               |
| Hypertension, n (%)         | 300 (54.2)             | 230 (40.8)                | 0.5485               |
| BMI, kg/m <sup>2</sup>      | 30.0 ± 6.5             | 29.4 ± 6.7                | 0.4375               |

<sup>1</sup>Chi square or t-test p-values, as appropriate, comparing characteristics of USS study participants with eligible non-participants

<sup>2</sup> 47.7% CARDIA, 41.7% MESA, 10.7% MESA Family for participants;  
48.9% CARDIA, 37.3% MESA, 13.7% MESA Family for non-participants

**Web Table 2.** Predictive equations for 24-h sodium excretion based on single spot urinary sodium concentrations<sup>1</sup>

| Equation/<br>Reference                                        | Spot Urine Collection<br>Timing                                       | Age<br>range<br>(y) | Low to high group mean<br>observed 24-h sodium<br>excretion <sup>1</sup> | Predictive Equation for 24-Hour Na Excretion (mg)                                                                                                                                                                                                                                                                                                                                                                                  |
|---------------------------------------------------------------|-----------------------------------------------------------------------|---------------------|--------------------------------------------------------------------------|------------------------------------------------------------------------------------------------------------------------------------------------------------------------------------------------------------------------------------------------------------------------------------------------------------------------------------------------------------------------------------------------------------------------------------|
| INTERSALT <sup>2</sup><br>Male (n=241)<br>Female<br>(n=2,852) | Random before 24-hour<br>urine collection                             | 20-59               | 3386–5520                                                                | Men: = 23 x {25.46 + [0.46 x spt NA (mmol/L)] - [2.75 x spot Cr (mmol/L)] - [0.13 x spot K (mmol/L)] + [4.10 x BMI (kg/m <sup>2</sup> )] + [0.26 x age (yr)]}<br><br>Women: = 23 x {5.07 + [0.34 x spt NA (mmol/L)] - [2.16 x spot Cr (mmol/L)] - [0.09 x spot K (mmol/L)] + [2.39 x BMI (kg/m <sup>2</sup> )] + [2.35 x age (yr)] - [0.03 x age <sup>2</sup> (yr)]}                                                               |
| Tanaka <sup>3</sup> (n=591)                                   | Random before 24-hour<br>urine collection                             | 20-59               | 2709–3852                                                                | =23 x (21.98 x XNa <sup>0.392</sup> ), where XNA = [spot Na (mmol/l) / spot Creatinine (mg/dL) x 10] x Pr24hCr (mg/day)<br><br>Pr24hrCr (mg/day) = [-2.04 x age (y)] + [14.89 x WT (kg)] + [16.14 x HT (cm)] - 2244.45                                                                                                                                                                                                             |
| Kawasaki <sup>4</sup><br>(n=159)                              | 2 <sup>nd</sup> morning urine<br>collection after 24-hr<br>collection | 20-59               | 3337–5150                                                                | =23 x (16.3 x XNa <sup>0.5</sup> ), where XNA = [spot Na (mmol/l) / spot Creatinine (mg/dL) x 10] x Pr24hCr (mg/day)<br><br>M: Pr24hrCr (mg/day) = [-12.63 x age (y)] + [15.12 x WT (kg)] + [7.39 x HT (cm)] - 79.9<br><br>F: Pr24hrCr (mg/day) = [-4.72 x age (y)] + [8.58 x WT (kg)] + [5.09 x HT (cm)] - 74.5                                                                                                                   |
| Mage <sup>5,6</sup>                                           | Random Urine<br>Specimens                                             | 20-79               | 4287–5350                                                                | = {[23 x spot NA (mmol/L)] / [spot Cr (mg/dL) x 10]} x [Pr24HrCr (mg/day)]<br><br>M: Pr24HrCr (mg/day) = 0.00179 x [140 - age (yr)] x [WT (kg)] <sup>1.5</sup> x HT (cm) <sup>0.5</sup> x [1 + 0.18 x B x [1.366 - 0.0159 x BMI (kg/m <sup>2</sup> )]]<br><br>F: Pr24HrCr (mg/day) = 0.00163 x [140 - age (yr)] x [WT (kg)] <sup>1.5</sup> x HT (cm) <sup>0.5</sup> x [1 + 0.18 x B x [1.429 - 0.0198 x BMI (kg/m <sup>2</sup> )]] |

<sup>1</sup>Cogswell et al 2013 (Am J Clin Nutr)

<sup>2</sup>Brown et al 2013 (Am J Epi). INTERSALT, International Cooperative Study on Salt and Blood Pressure.

<sup>3</sup>Tanaka et al 2002 (J Human Htn)

<sup>4</sup>Kawasaki et al 1993 (Clin Exp Pharm & Phys)

<sup>5</sup>Mage et al 2008 (J Exp Sci & Env Epi)

<sup>6</sup>Huber et al 2007 (J Exp Sci & Env Epi)

**Web Table 3.** Characteristics of Day 1 urine collections<sup>1</sup>

|                                                  | Total (n=554)             |
|--------------------------------------------------|---------------------------|
| Voids collected per person                       | 8.9 (3-23)                |
| Total urine volume, mL                           | 1838.3 ± 810.0 (512-5601) |
| Total collection time, h                         | 23.9 ± 1.1                |
| Missed one void during collection                | 12 (2.2)                  |
| Total timed-spot specimens collected, n          |                           |
| Morning                                          | 540 (97.5)                |
| Afternoon                                        | 528 (95.3)                |
| Evening                                          | 545 (98.3)                |
| Overnight                                        | 553 (99.8)                |
| Timed-spot specimens provided by participants, n |                           |
| 2                                                | 3 (0.5)                   |
| 3                                                | 449 (7.9)                 |
| 4                                                | 507 (91.5)                |

<sup>1</sup>Values are means (range), means ± SDs (range), or n (%).

**Web Table 4.** Distributions of total urine volume and 24-h excretion of sodium and creatinine in the day 1 collection by race and gender.<sup>1</sup>

|                  | N   | Means $\pm$ SDs  | Percentile |      |      |
|------------------|-----|------------------|------------|------|------|
|                  |     |                  | 25th       | 50th | 75th |
| Total volume, ml |     |                  |            |      |      |
| Black male       | 134 | 1691 $\pm$ 731   | 1089       | 1566 | 2132 |
| Black female     | 185 | 1727 $\pm$ 780   | 1143       | 1573 | 2245 |
| White male       | 110 | 2053 $\pm$ 832*  | 1424       | 1907 | 2519 |
| White female     | 125 | 1965 $\pm$ 865*  | 1393       | 1897 | 2313 |
| Sodium, mg       |     |                  |            |      |      |
| Black male       | 134 | 3454 $\pm$ 1651  | 2350       | 3237 | 4388 |
| Black female     | 185 | 3397 $\pm$ 1641  | 2334       | 3168 | 4203 |
| White male       | 109 | 3926 $\pm$ 1623* | 2928       | 3795 | 4651 |
| White female     | 124 | 2480 $\pm$ 1079* | 1814       | 2245 | 3260 |
| Creatinine, mg   |     |                  |            |      |      |
| Black male       | 134 | 1961 $\pm$ 645   | 1526       | 1947 | 2278 |
| Black female     | 185 | 1404 $\pm$ 456   | 1106       | 1383 | 1546 |
| White male       | 109 | 1915 $\pm$ 526   | 1575       | 1877 | 2182 |
| White female     | 124 | 1101 $\pm$ 263*  | 921        | 1068 | 1249 |

<sup>1</sup>Values are means  $\pm$  SDs or percentiles.

\*Within an analyte, different from blacks within the same gender,  $p < 0.05$

**Web Table 5.** Distributions of mean urine volume and concentration of sodium, and creatinine in timed-spot urine specimens in the day 1 collection by race and gender.<sup>1,2,3</sup>

|                    | Timing of spot urine collection |            |            |            |
|--------------------|---------------------------------|------------|------------|------------|
|                    | Overnight                       | Morning    | Afternoon  | Evening    |
| Total volume, ml   |                                 |            |            |            |
| Black male         | 290 ± 125                       | 190 ± 114  | 196 ± 99   | 192 ± 100  |
| Black female       | 325 ± 182                       | 160 ± 115  | 161 ± 104  | 183 ± 109  |
| White male         | 353 ± 184*                      | 219 ± 147  | 226 ± 112* | 226 ± 110* |
| White female       | 371 ± 165*                      | 193 ± 156* | 193 ± 128* | 194 ± 120  |
| Sodium, mmol/L     |                                 |            |            |            |
| Black male         | 96 ± 55                         | 106 ± 54   | 109 ± 53   | 110 ± 56   |
| Black female       | 89 ± 55                         | 107 ± 60   | 111 ± 58   | 110 ± 59   |
| White male         | 97 ± 46                         | 92 ± 49*   | 96 ± 52    | 101 ± 51   |
| White female       | 67 ± 42*                        | 77 ± 48*   | 70 ± 49*   | 74 ± 47*   |
| Creatinine, mmol/L |                                 |            |            |            |
| Black male         | 13 ± 8                          | 13 ± 8     | 13 ± 8     | 16 ± 9     |
| Black female       | 9 ± 6                           | 10 ± 7     | 11 ± 8     | 13 ± 7     |
| White male         | 11 ± 6*                         | 10 ± 6*    | 10 ± 5*    | 12 ± 6*    |
| White female       | 6 ± 4*                          | 7 ± 5*     | 8 ± 6*     | 9 ± 6*     |

<sup>1</sup>Values are means ± SDs or percentiles.

<sup>2</sup>Timing of specimens: overnight (the first void after the longest period of sleep), 0400–1200 h; morning (the second void upon rising in the morning), 0830 to 1230 h; afternoon, 1231 to 1730 h; and evening, 1731 to 2359 h.

<sup>3</sup>Includes 134 Black men, 185 Black women, 110 White men and 125 White women

**Web Table 6.** Within-person, day-to-day CVs and the ratio of within- to between-person variance of sodium, potassium, chloride, creatinine, and iodine excretions in 24-h urine samples and timed-spot urine specimens<sup>1,2,3</sup>

|                | Within-person CV, % |           |         |           |         | Ratio of within- to between-person variance |           |         |           |         |
|----------------|---------------------|-----------|---------|-----------|---------|---------------------------------------------|-----------|---------|-----------|---------|
|                | 24-h                | Overnight | Morning | Afternoon | Evening | 24-h                                        | Overnight | Morning | Afternoon | Evening |
| Sodium, mg     |                     |           |         |           |         |                                             |           |         |           |         |
| Black          | 37.9                | 56.3      | 70.3    | 64.3      | 55.3    | 1.5                                         | 2.4       | 4.0     | 4.5       | 1.8     |
| White          | 31.3                | 41.4      | 52.2    | 52.3      | 53.0    | 1.1                                         | 0.7       | 1.1     | 0.9       | 1.8     |
| Creatinine, mg |                     |           |         |           |         |                                             |           |         |           |         |
| Black          | 24.4                | 41.0      | 51.0    | 48.7      | 46.5    | 0.8                                         | 1.1       | 2.1     | 1.8       | 1.8     |
| White          | 51.2                | 33.6      | 40.8    | 42.3      | 47.1    | 2.9                                         | 0.5       | 1.2     | 0.8       | 1.0     |

<sup>1</sup>Within-person CVs were calculated as the square root of the within-person variance divided by the mean of each analyte.

<sup>2</sup>Only included individuals with two day urine collections.

<sup>3</sup>Includes 48 Black men, 63 Black women, 35 White men and 40 White women

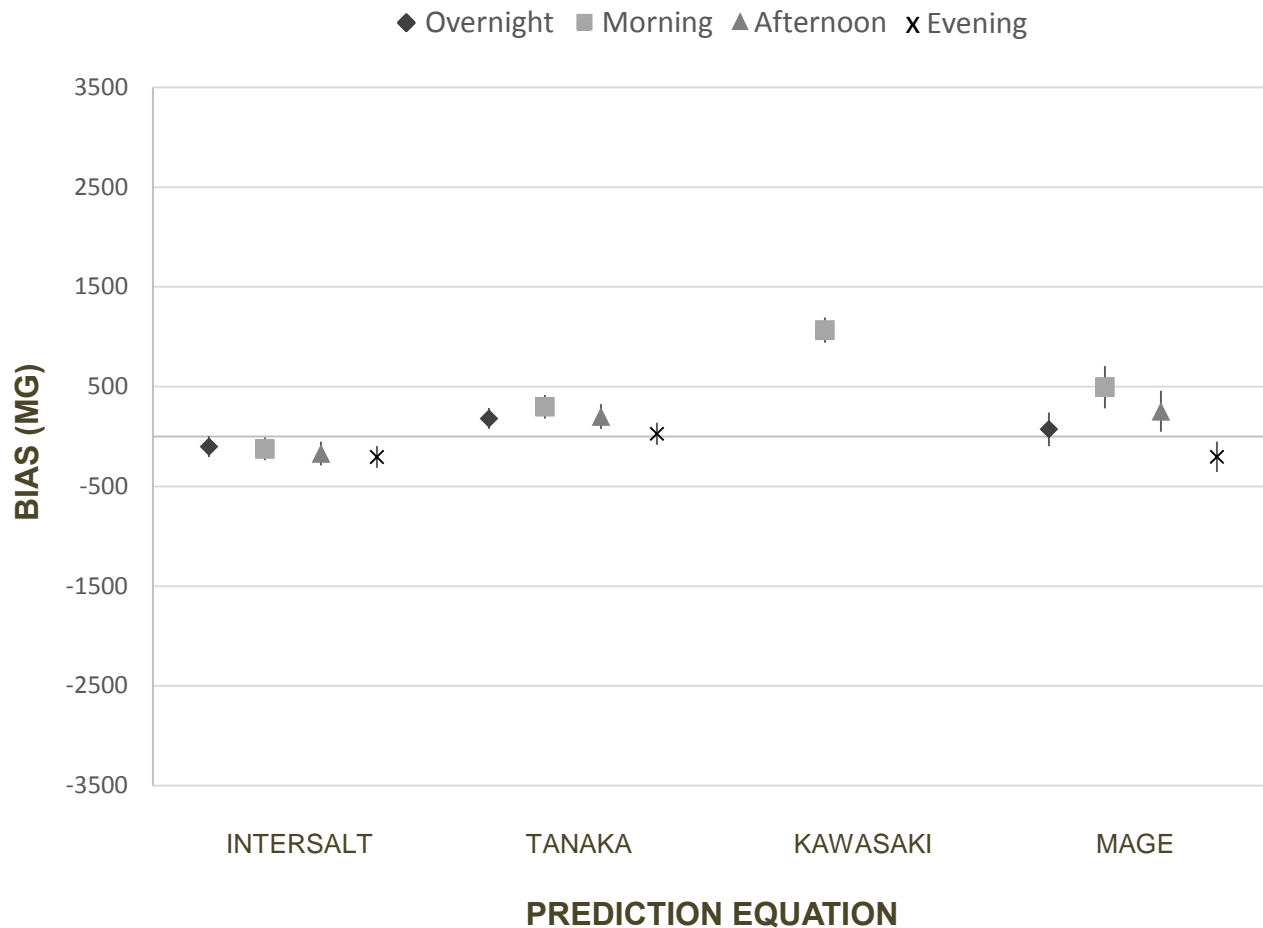

**Web Figure 1.** Mean bias in predicted minus measured 24-h sodium excretion based on the same day by prediction equation and by timing of the spot urine collection in adults. The mean bias in predicted 24-h sodium excretion by using each equation is shown for a single urine specimen collected at various time-spots. The 95% CIs for the mean bias are shown by the vertical lines surrounding each mean. INTERSALT, International Cooperative Study on Salt and Blood Pressure. n=554

**Web Table 7.** Predicted 24-h Sodium Excretion and Mean Bias Produced by using the Equation with the Least Bias for Each Gender-Race Group<sup>1</sup>

|           | n   | Measured 24-h sodium excretion |        | Predicted 24-h urinary sodium excretion (mg/d) |        | Bias (Predicted – Measured) in 24-h urinary sodium excretion |          |          |
|-----------|-----|--------------------------------|--------|------------------------------------------------|--------|--------------------------------------------------------------|----------|----------|
|           |     | Mean                           | SD     | Mean                                           | SD     | Bias                                                         | Lower CI | Upper CI |
| Overnight | 553 | 3289.1                         | 1552.2 | 3329.0                                         | 1322.6 | 41.5                                                         | -71.9    | 154.8    |
| Morning   | 540 | 3320.3                         | 1611.8 | 3479.0                                         | 1386.2 | 160.2                                                        | 29.6     | 290.8    |
| Afternoon | 528 | 3335.9                         | 1610.8 | 3366.2                                         | 1351.3 | 34.2                                                         | -97.4    | 165.8    |
| Evening   | 545 | 3319.1                         | 1604.3 | 3206.4                                         | 1308.7 | -111.2                                                       | -229.1   | 6.7      |

<sup>1</sup>Across all times, the Tanaka equation was used for black males and black females, INTERSALT equation for white males, Mage equation for white females.



**Web Table 8.** Intraclass Correlation Coefficients With Measured 24-hour Sodium Excretion, by Population Subgroup and the Timing of Spot Urine Specimen Collections in Adults Aged 45–79 Years, Chicago, Illinois, 2013<sup>a</sup>

|                    | n   | Predicted 24-h Sodium Excretion |        |          |      |
|--------------------|-----|---------------------------------|--------|----------|------|
|                    |     | INTERSALT                       | Tanaka | Kawasaki | Mage |
| <b>All</b>         |     |                                 |        |          |      |
| Overnight          | 540 | 0.54                            | 0.51   |          | 0.56 |
| Morning            | 529 | 0.50                            | 0.44   | 0.36     | 0.41 |
| Afternoon          | 520 | 0.48                            | 0.42   |          | 0.43 |
| Evening            | 537 | 0.54                            | 0.51   |          | 0.58 |
| <b>Black men</b>   |     |                                 |        |          |      |
| Overnight          | 131 | 0.51                            | 0.55   |          | 0.59 |
| Morning            | 124 | 0.43                            | 0.48   | 0.4      | 0.5  |
| Afternoon          | 119 | 0.36                            | 0.33   |          | 0.41 |
| Evening            | 128 | 0.52                            | 0.49   |          | 0.54 |
| <b>Black women</b> |     |                                 |        |          |      |
| Overnight          | 179 | 0.4                             | 0.57   |          | 0.51 |
| Morning            | 180 | 0.32                            | 0.33   | 0.24     | 0.22 |
| Afternoon          | 170 | 0.31                            | 0.38   |          | 0.30 |
| Evening            | 181 | 0.41                            | 0.55   |          | 0.60 |
| <b>White men</b>   |     |                                 |        |          |      |
| Overnight          | 108 | 0.36                            | 0.39   |          | 0.53 |
| Morning            | 105 | 0.42                            | 0.52   | 0.51     | 0.62 |
| Afternoon          | 108 | 0.33                            | 0.44   |          | 0.57 |
| Evening            | 109 | 0.38                            | 0.41   |          | 0.51 |
| <b>White women</b> |     |                                 |        |          |      |
| Overnight          | 122 | 0.53                            | 0.35   |          | 0.54 |
| Morning            | 120 | 0.52                            | 0.32   | 0.18     | 0.49 |
| Afternoon          | 123 | 0.51                            | 0.37   |          | 0.51 |
| Evening            | 119 | 0.54                            | 0.43   |          | 0.55 |

<sup>a</sup>All values are intraclass correlation coefficients between measured 24-hour sodium excretion and predicted 24-hour sodium excretion based on sodium concentration from a spot urine collection used with 1 of the 4 estimation equations: INTERSALT, Tanaka, Kawasaki, and Mage. The timing of urine specimens was as follows: overnight (the first void after the longest period of sleep), 0400–1200 the next morning; morning (the second void on rising in the morning), 0830–1230; afternoon, 1231–1730; and evening, 1731–2359. All intraclass correlation coefficients were statistically significant at  $P < 0.05$ . INTERSALT, International Cooperative Study on Salt and Blood Pressure.

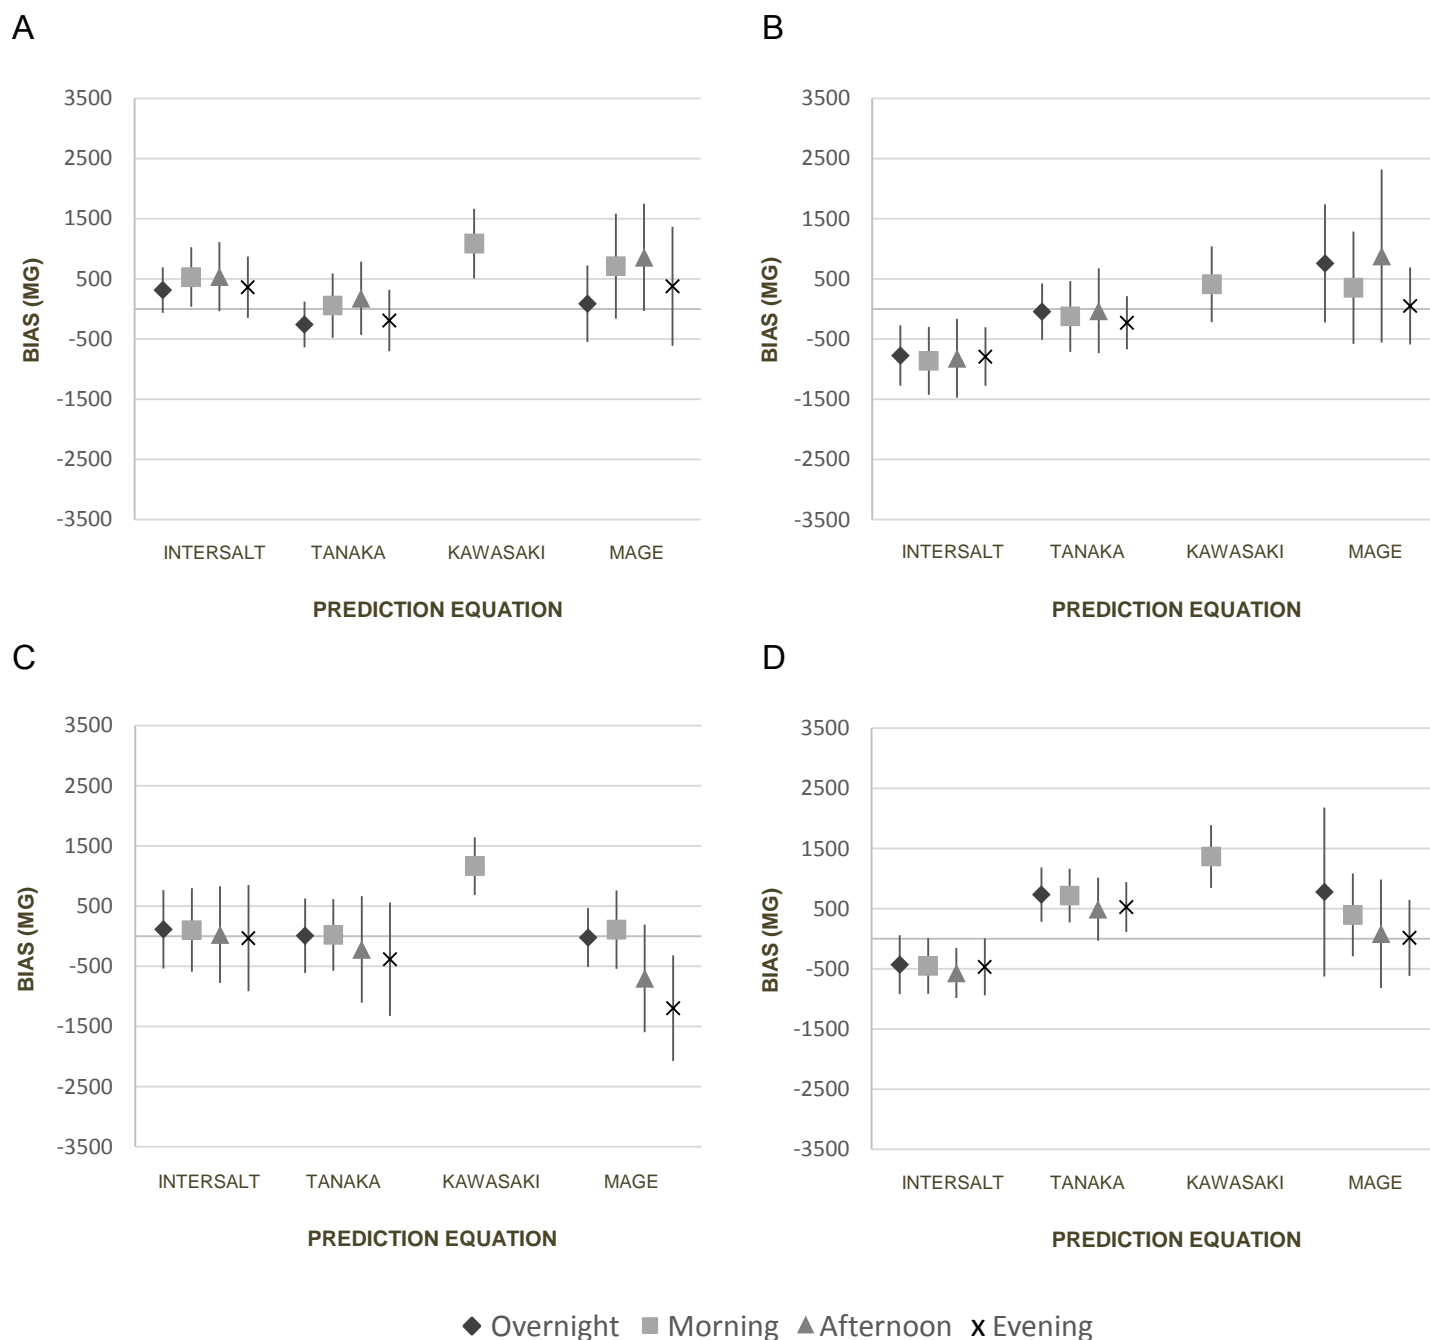

**Web Figure 2.** Mean bias in predicted minus measured 24-h sodium excretion based on the same day by prediction equation and by timing of the spot urine collection in adults within the following race-sex subgroups: black men (A) (n=32), black women (B) (n=42), white men (C) (n=14), and white women (D) (n=17) for participants with **uncontrolled hypertension**. The mean bias in predicted 24-h sodium excretion by using each equation is shown for a single urine specimen collected overnight, in the morning, in the afternoon, and in the evening. The 95% CIs of the mean bias are shown by the vertical lines surrounding each mean. Total N=105.

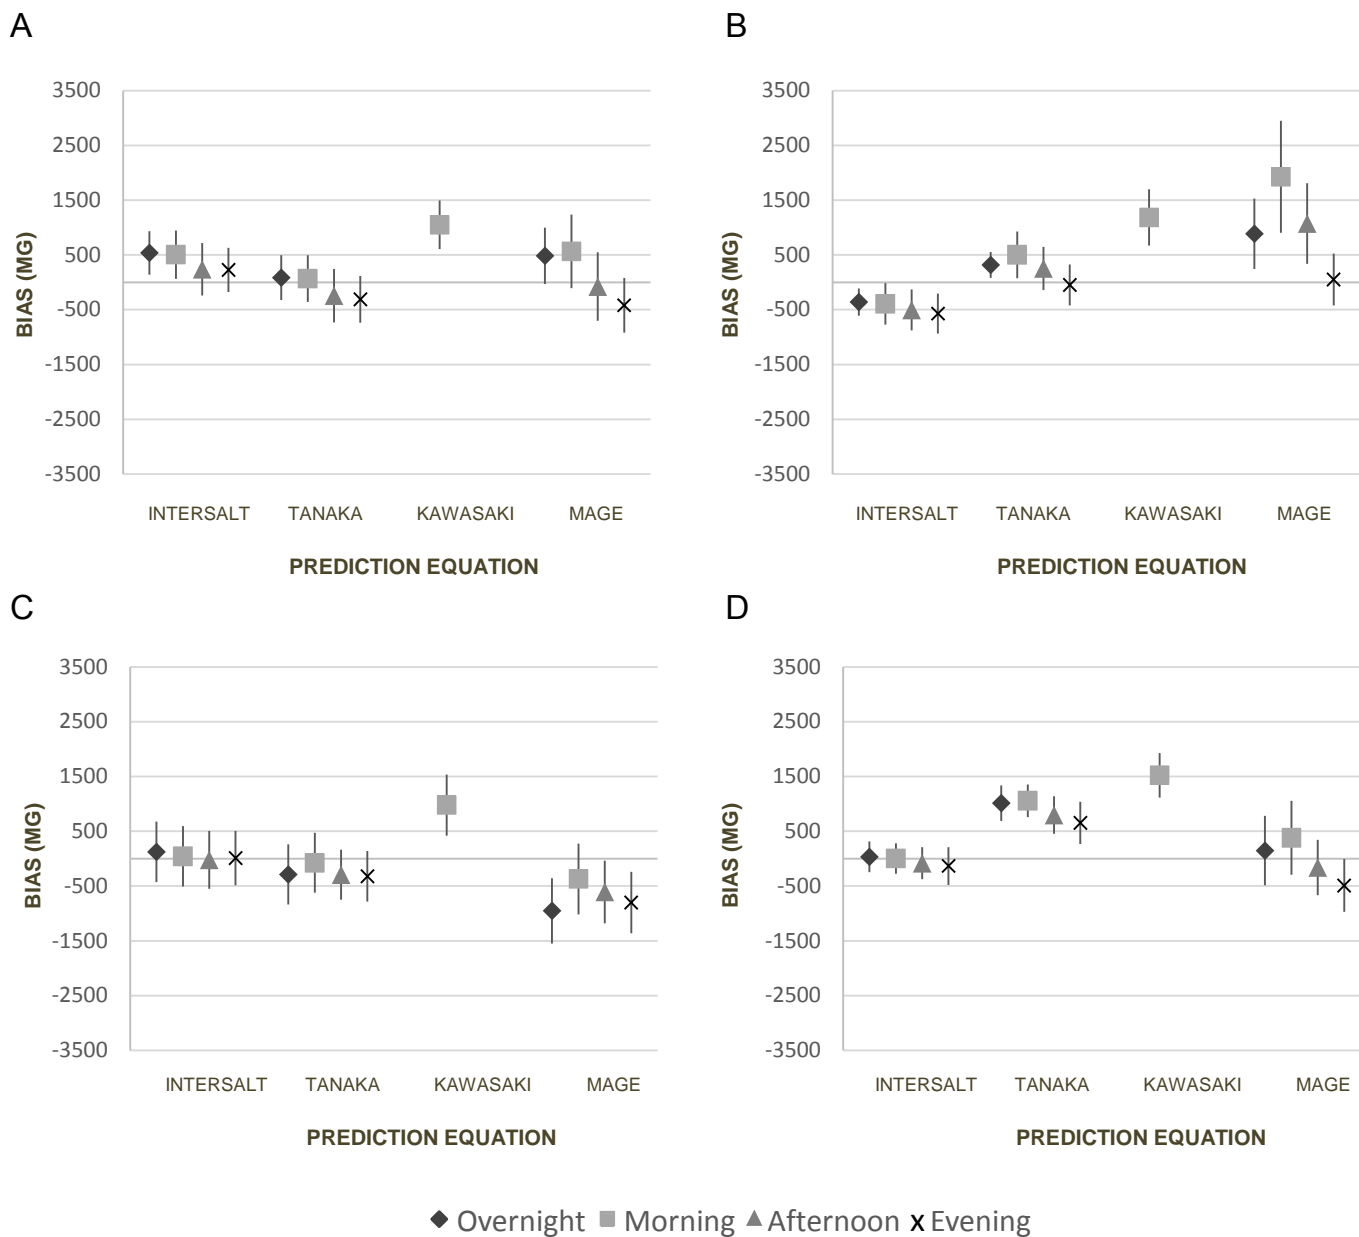

**Web Figure 3.** Mean bias in predicted minus measured 24-h sodium excretion based on the same day by prediction equation and by timing of the spot urine collection in adults within the following race-sex subgroups: black men (A) (n=44), black women (B) (n=64), white men (C) (n=38), and white women (D) (n=32) for participants with **controlled hypertension**. The mean bias in predicted 24-h sodium excretion by using each equation is shown for a single urine specimen collected overnight, in the morning, in the afternoon, and in the evening. The 95% CIs of the mean bias are shown by the vertical lines surrounding each mean. Total N = 178.

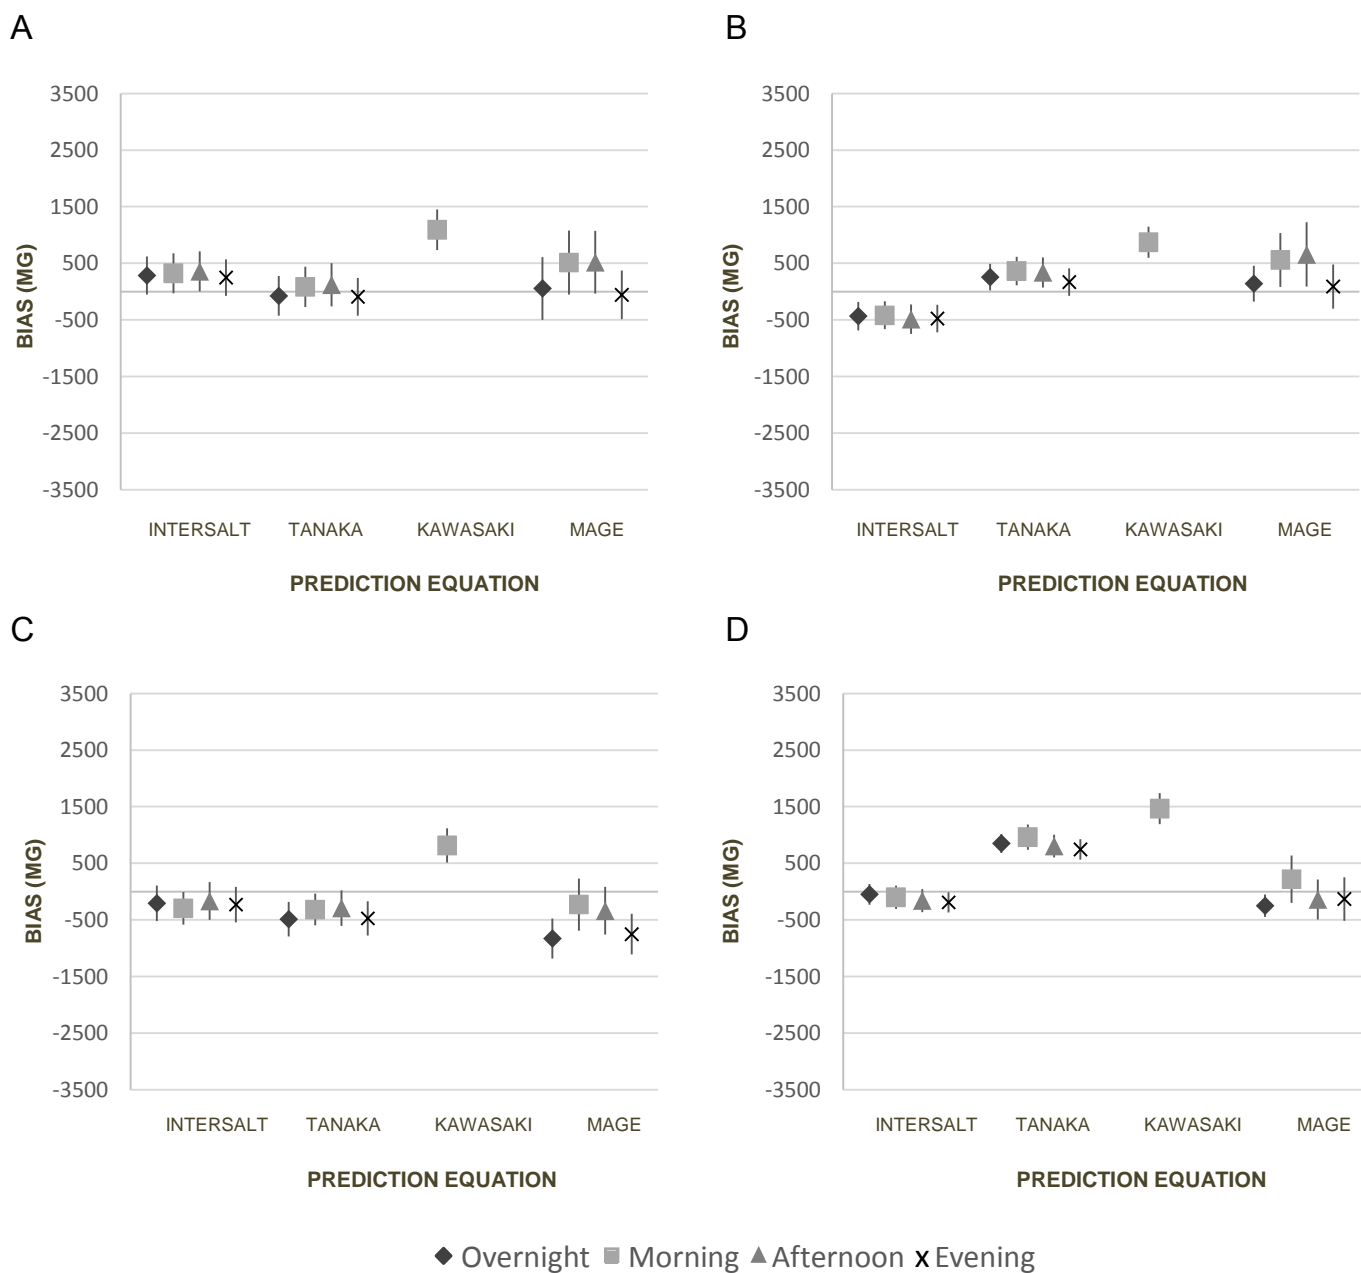

**Web Figure 4.** Mean bias in predicted minus measured 24-h sodium excretion based on the same day by prediction equation and by timing of the spot urine collection in adults within the following race-sex subgroups: black men (A) (n=58), black women (B) (n=79), white men (C) (n=58), and white women (D) (n=76) for participants with **no hypertension**. The mean bias in predicted 24-h sodium excretion by using each equation is shown for a single urine specimen collected overnight, in the morning, in the afternoon, and in the evening. The 95% CIs of the mean bias are shown by the vertical lines surrounding each mean. Total N = 271.

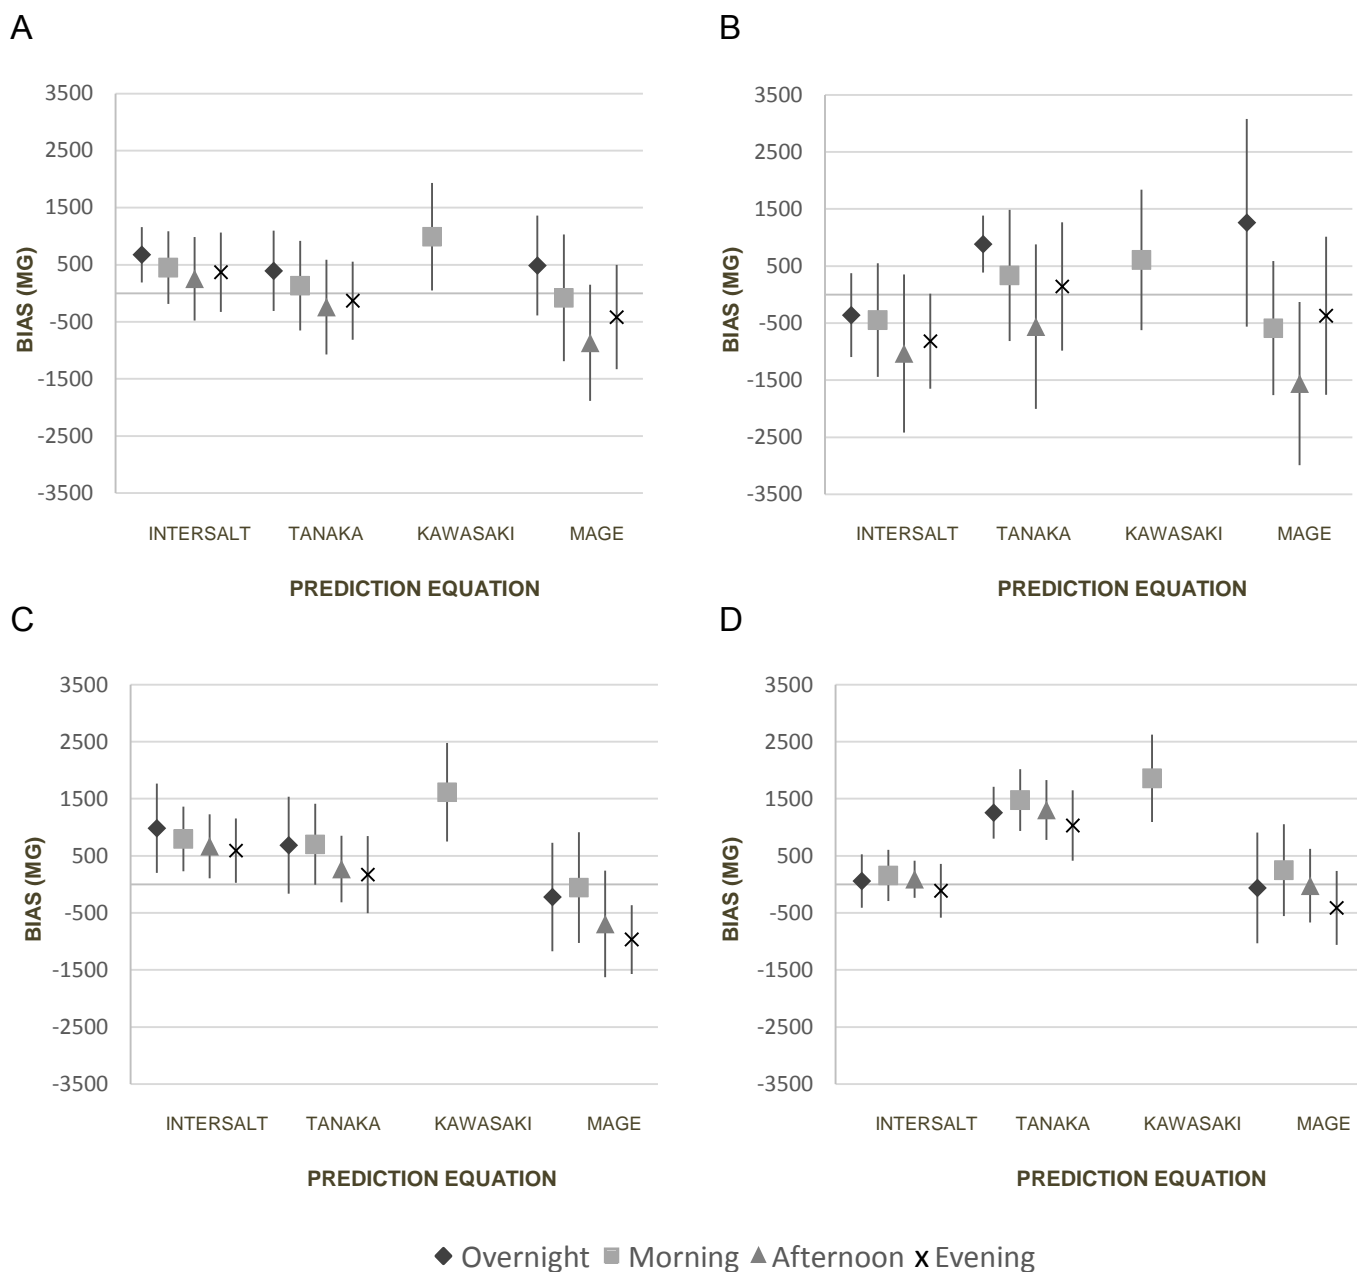

**Web Figure 5.** Mean bias in predicted minus measured 24-h sodium excretion based on the same day by prediction equation and by timing of the spot urine collection in adults within the following race-sex subgroups: black men (A) (n=10), black women (B) (n=9), white men (C) (n=8), and white women (D) (n=9) for participants with  $eGFR \leq 60$ . The mean bias in predicted 24-h sodium excretion by using each equation is shown for a single urine specimen collected overnight, in the morning, in the afternoon, and in the evening. The 95% CIs of the mean bias are shown by the vertical lines surrounding each mean. Total N = 36.

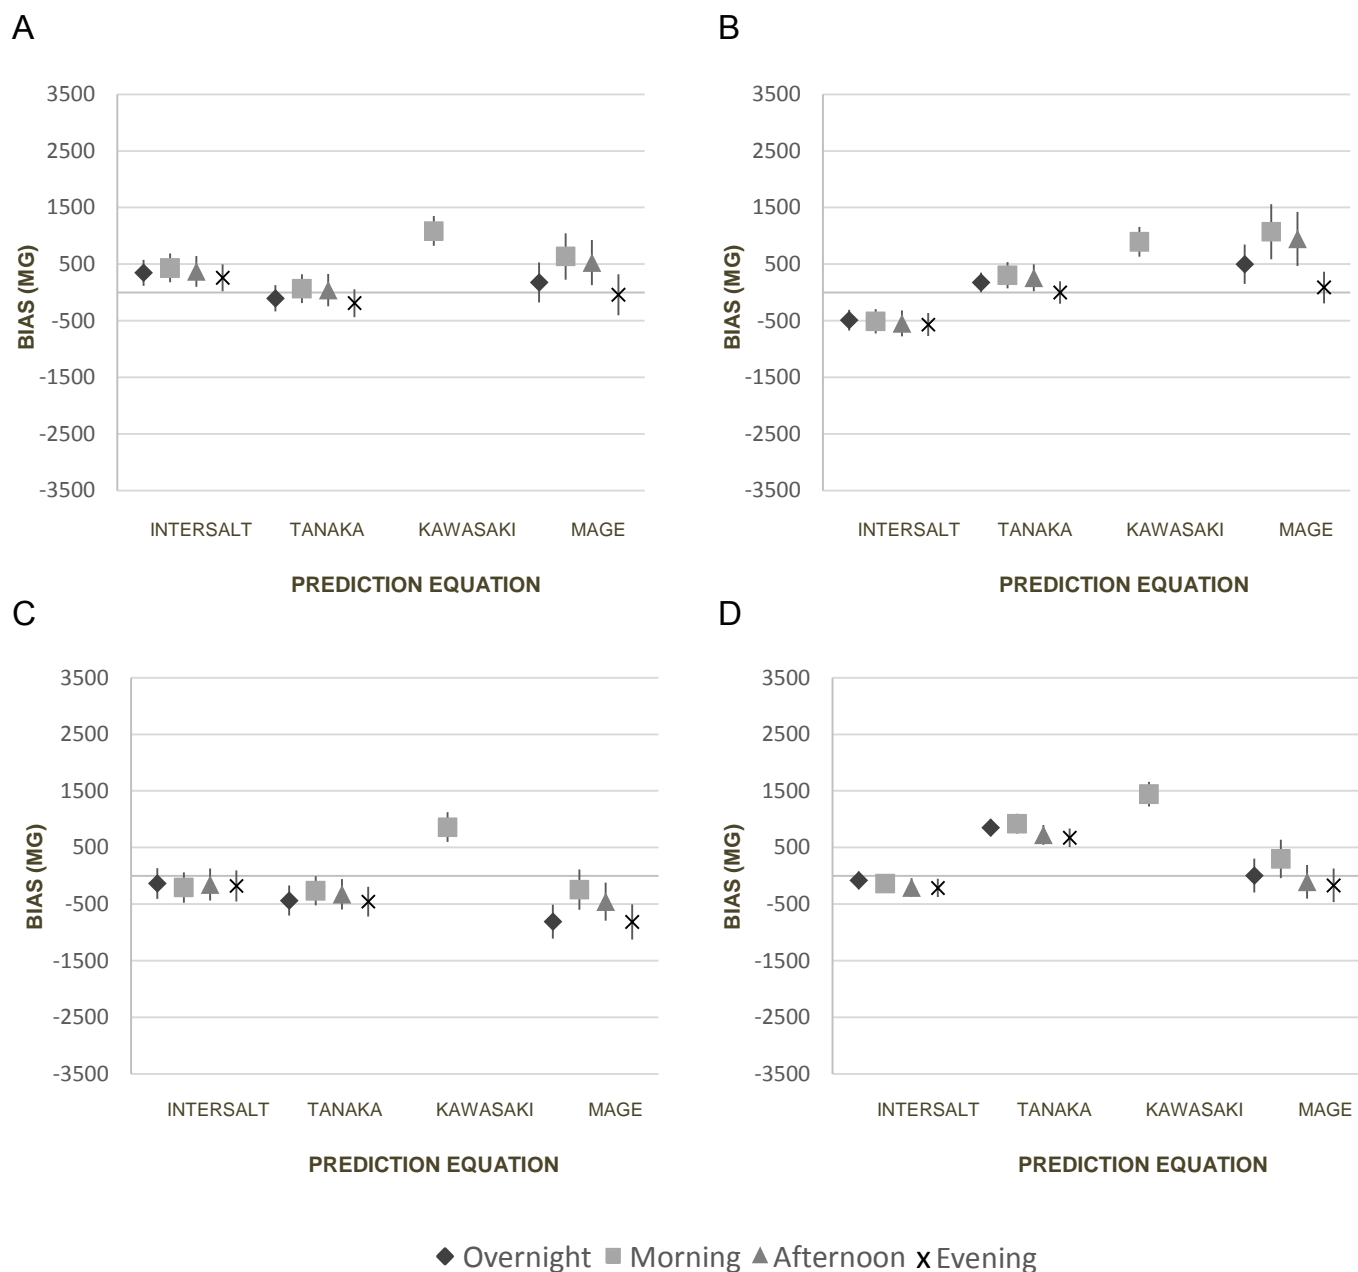

**Web Figure 6.** Mean bias in predicted minus measured 24-h sodium excretion based on the same day by prediction equation and by timing of the spot urine collection in adults within the following race-sex subgroups: black men (A) (n=124), black women (B) (n=176), white men (C) (n=102), and white women (D) (n=116) for participants with  $eGFR > 60$ . The mean bias in predicted 24-h sodium excretion by using each equation is shown for a single urine specimen collected overnight, in the morning, in the afternoon, and in the evening. The 95% CIs of the mean bias are shown by the vertical lines surrounding each mean. Total N = 518.
